# Supplementary material for: Net carbon emissions from African biosphere dominate pan-tropical atmospheric CO2 signal
Source: PubMed Central journal article supplement (PMC6692308; doi:10.1038/s41467-019-11097-w), 2019-08-13
Supplement: 41467_2019_11097_MOESM2_ESM.pdf [file 41467_2019_11097_MOESM2_ESM.pdf]

REVIEWERS' COMMENTS:

Reviewer #1 (Remarks to the Author):

I have seen the manuscript multiple times by now and think the authors did the best they could at the current stage, this manuscript will trigger stimulating discussions.
